# Supplementary material for: Enhanced reproducibility of the high efficiency perovskite solar cells via a thermal treatment
Source: Royal Society of Chemistry journal article supplement (doi:10.1039/c5ra07176c), 2015-01-01
Supplement: c5ra07176c1.pdf [file c5ra07176c1.pdf]

### Supplementary Information

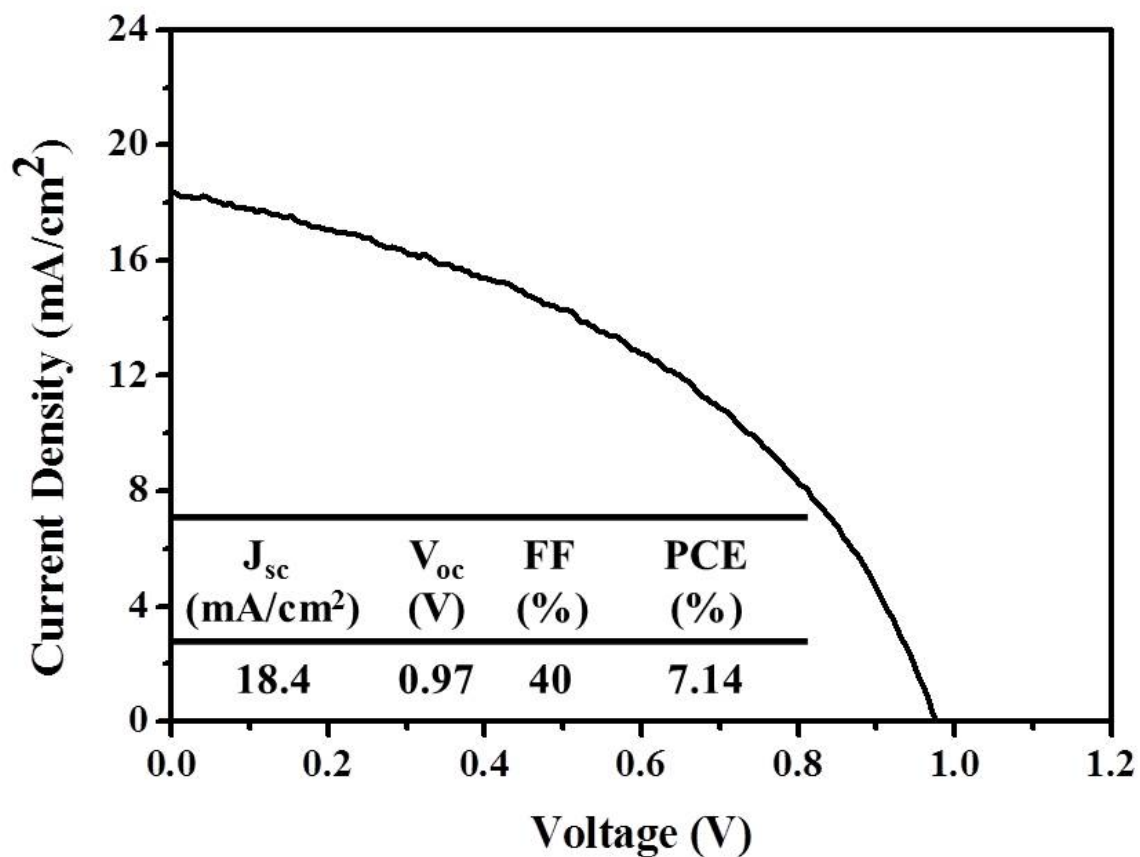

**Fig. S1** I-V curve of the perovskite solar cells with perovskite dye deposited via two-step process onto the 600 nm-thick *m*-TiO<sub>2</sub> layers. Inset showed the different parameters of the perovskite solar cells.
